# Supplementary material for: Characterization of a novel OTX2‐driven stem cell program in Group 3 and Group 4 medulloblastoma
Source: PubMed Central journal article supplement (PMC5891039; doi:10.1002/1878-0261.12177), 2018-03-01
Supplement: MOL2-12-495-s001.pdf [file MOL2-12-495-s001.pdf]

**Characterization of a novel OTX2-driven stem cell program in Group 3 and Group 4  
medulloblastoma**

Margaret Stromecki, Nazanin Tatari, Ludivine Coudière Morrison, Ravinder Kaur, Jamie Zagozewski, Gareth Palidwor, Vijay Ramaswamy, Patryk Skowron, Matthias Wöfl, Till Milde, Marc R. Del Bigio, Michael D. Taylor, Tamra Werbowetski-Ogilvie

**SUPPLEMENTARY FIGURE AND TABLE LEGENDS:**

**Supplementary Fig. 1: Knockdown of OTX2 in Group 3 and Group 4 MB decreases tumorsphere formation and self-renewal.** (A). Western Blot validation of OTX2 knockdown in tumorspheres from the D341 MB cell line. (B). Representative images of tumorspheres at secondary passage following OTX2 knockdown in D341 cells. (C-D). Quantification of primary (C) and secondary (D) tumorsphere number in D341 tumorspheres following OTX2 knockdown. Error Bars: s.e.m.  $p < 0.05^*$ ,  $p < 0.01^{**}$ ,  $p < 0.001^{***}$ . (E). Western Blot validation of OTX2 knockdown in tumorspheres from MB3W1 tumorspheres. (F). Representative images of tumorspheres at secondary passage following OTX2 knockdown in MB3W1 cells. (G-H). Quantification of primary (G) and secondary (H) tumorsphere number in MB3W1 tumorspheres following OTX2 knockdown. Error Bars: s.e.m.  $p < 0.05^*$ ,  $p < 0.001^{***}$ . For all experiments, N=3 biological replicates or independent transfections for each siRNA.

**Supplementary Fig. 2: Semaphorin genes are negatively correlated with OTX2 expression in Group 3 and Group 4 MB cells.** Expression of select semaphorin pathway genes (*SEMA4D*, *NRP1*, *L1CAM*, *SEMA6A*, *PLXNA2*) in D283 (A) D341 (B) and MB3W1 (C) MB tumorspheres following OTX2 knockdown using 3 siRNAs by qPCR. Error bars: s.e.m. N=3 biological replicates, n=9 technical replicates.

**Supplementary Fig. 3: Axon guidance gene expression is upregulated following OTX2 knockdown in Group 3 and Group 4 MB cells.** Expression of select axon guidance pathway genes (*SLIT2*, *EFNB2*, *EPHA3*, *EPHA5*, and *DCC*) in D283 (A) and D341 (B) tumorspheres following OTX2 knockdown using 3 siRNAs by qPCR. Error bars: s.e.m. N=3 biological replicates, n=9 technical replicates.

**Supplementary Fig. 4: Recombinant semaphorin protein treatment does not significantly affect cell number or viability of D283 tumorspheres.** (A-C). Total number of cells (upper) and viability (lower) in primary D283 tumorspheres following 5-day treatment with recombinant L1CAM Fc (A), SEMA4D (B) or NRP1 (C). (D-F) Total number of live cells (upper) and viability (lower) in secondary D283 tumorspheres following 5-day treatment with L1CAM Fc (D) SEMA4D (E) or NRP1 (F). For all experiments, N=4 biological replicates, n=20 L1CAM Fc, n=18 SEMA4D Fc and NRP1 Fc technical replicates. Error bars: s.e.m.

**Supplementary Fig. 5: Decreased levels of semaphorin pathway genes in MB3W1 OTX2 KD cells results in a partial rescue of tumorsphere formation and growth.** (A) Representative images of MB3W1 tumorspheres following dual OTX2 and either SEMA4D or NRP1 knockdown. Scale bar: 400  $\mu$ m. (B-C). Quantification of tumorsphere number following dual OTX2 and either SEMA4D (B) or NRP1 (C) knockdown in MB3W1 tumorspheres over 5 days. Error Bars: s.e.m.  $p < 0.001$ \*\*\*. N=3 biological replicates, n=12 SEMA4D KD and NRP1 KD technical replicates. (D-E). Quantification of total live cell number following dual OTX2 and either SEMA4D (D) or NRP1 (E) knockdown in MB3W1 tumorspheres over 5 days. Error Bars: s.e.m.  $p < 0.05$ \*. N=4 biological replicates, n=8 SEMA4D KD and NRP1 KD technical replicates.

**Supplementary Fig. 6: Decreased levels of semaphorin pathway genes in D283 and MB3W1 OTX2 KD tumorspheres does not significantly affect viability.** (A). Viability in D283 tumorspheres following dual OTX2 and either SEMA4D (left) or NRP1 (right) knockdown over 5 days. Error Bars: s.e.m. N=7 and N=8 biological replicates for SEMA4D and NRP1 respectively. (B). Viability in MB3W1 tumorspheres following dual OTX2 and either SEMA4D (left) or NRP1 (right) knockdown over 5 days. Error Bars: s.e.m. N=4 biological replicates for SEMA4D and NRP1.

**Supplementary Table 1:** List of antibodies and concentrations used for Western blots

**Supplementary Table 2:** List of primers sequences used for qPCR

**Supplementary Table 3: Neuronal differentiation genes that are significantly and differentially expressed following OTX2 knockdown in D283 tumorspheres.** Transcripts differentially expressed at least 2-fold (up- or downregulated) and with a value of  $P < 0.05$  were considered significant

**Supplementary Table 4: Axon guidance genes that are significantly and differentially expressed following OTX2 knockdown in D283 tumorspheres.** Transcripts differentially expressed at least 2-fold (up- or downregulated) and with a value of  $P < 0.05$  were considered significant.

**Supplementary Table 5: Axon guidance pathway genes that were significantly and differentially expressed following OTX2 KD and the number of OTX2 binding peaks /overlaps within -5kb+2kb of their transcriptional start sites.** Semaphorin genes significantly upregulated following OTX2 KD are highlighted in red.

**Supplementary Table 6a: Univariable cox regression analysis of survival by increasing *SEMA4D* expression across Group 3 and 4 medulloblastoma.**

**Supplementary Table 6b: Statistical analyses of survival in patients exhibiting high *SEMA6A*, *NRP1*, *NRP2*, or *LICAM* gene expression relative to patients with low *SEMA6A*, *NRP1*, *NRP2* or *LICAM* gene expression.**  $P < 0.05$  was considered significant.

**Supplementary Table 7: Gene Set Enrichment Analysis (GSEA) results for Reactome and KEGG databases identified pathways significantly enriched in gene sets that were downregulated in D283 Scramble relative to OTX2 KD tumorspheres.**

**Supplementary Table 8: GSEA revealed that genes associated with SEMA4D signaling were enriched in gene sets that were downregulated in D283 scramble relative to OTX2 KD tumorspheres.** All transcripts in the core enrichment were significantly different with a  $P < 0.05$ .

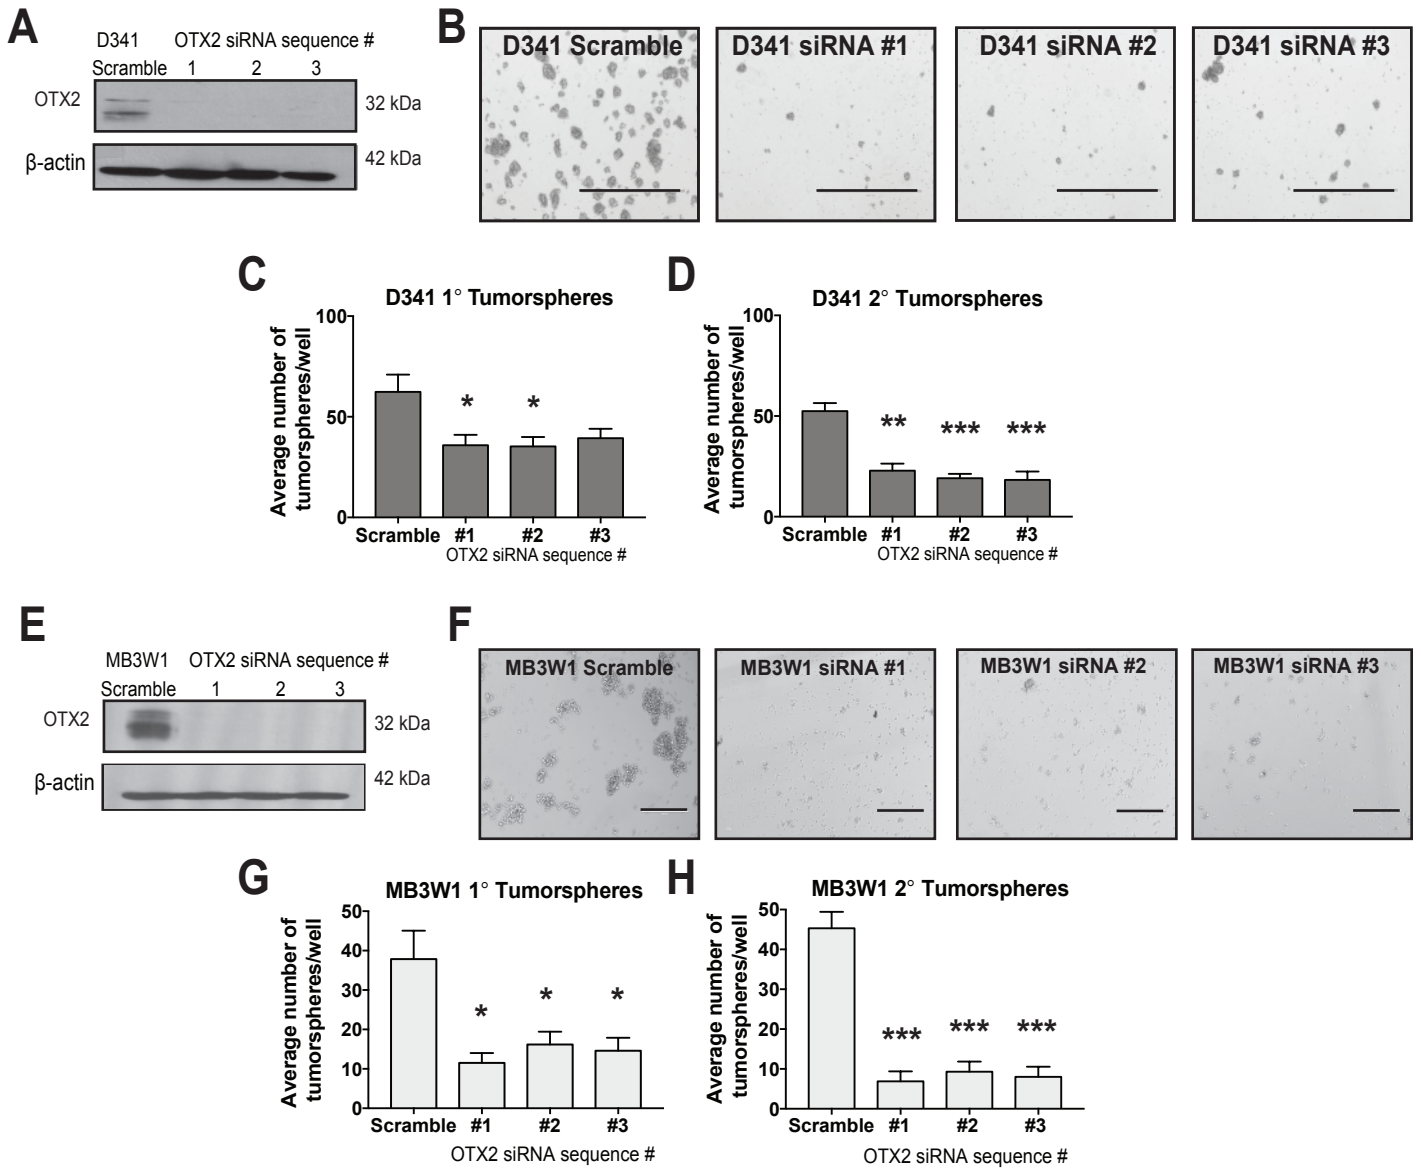

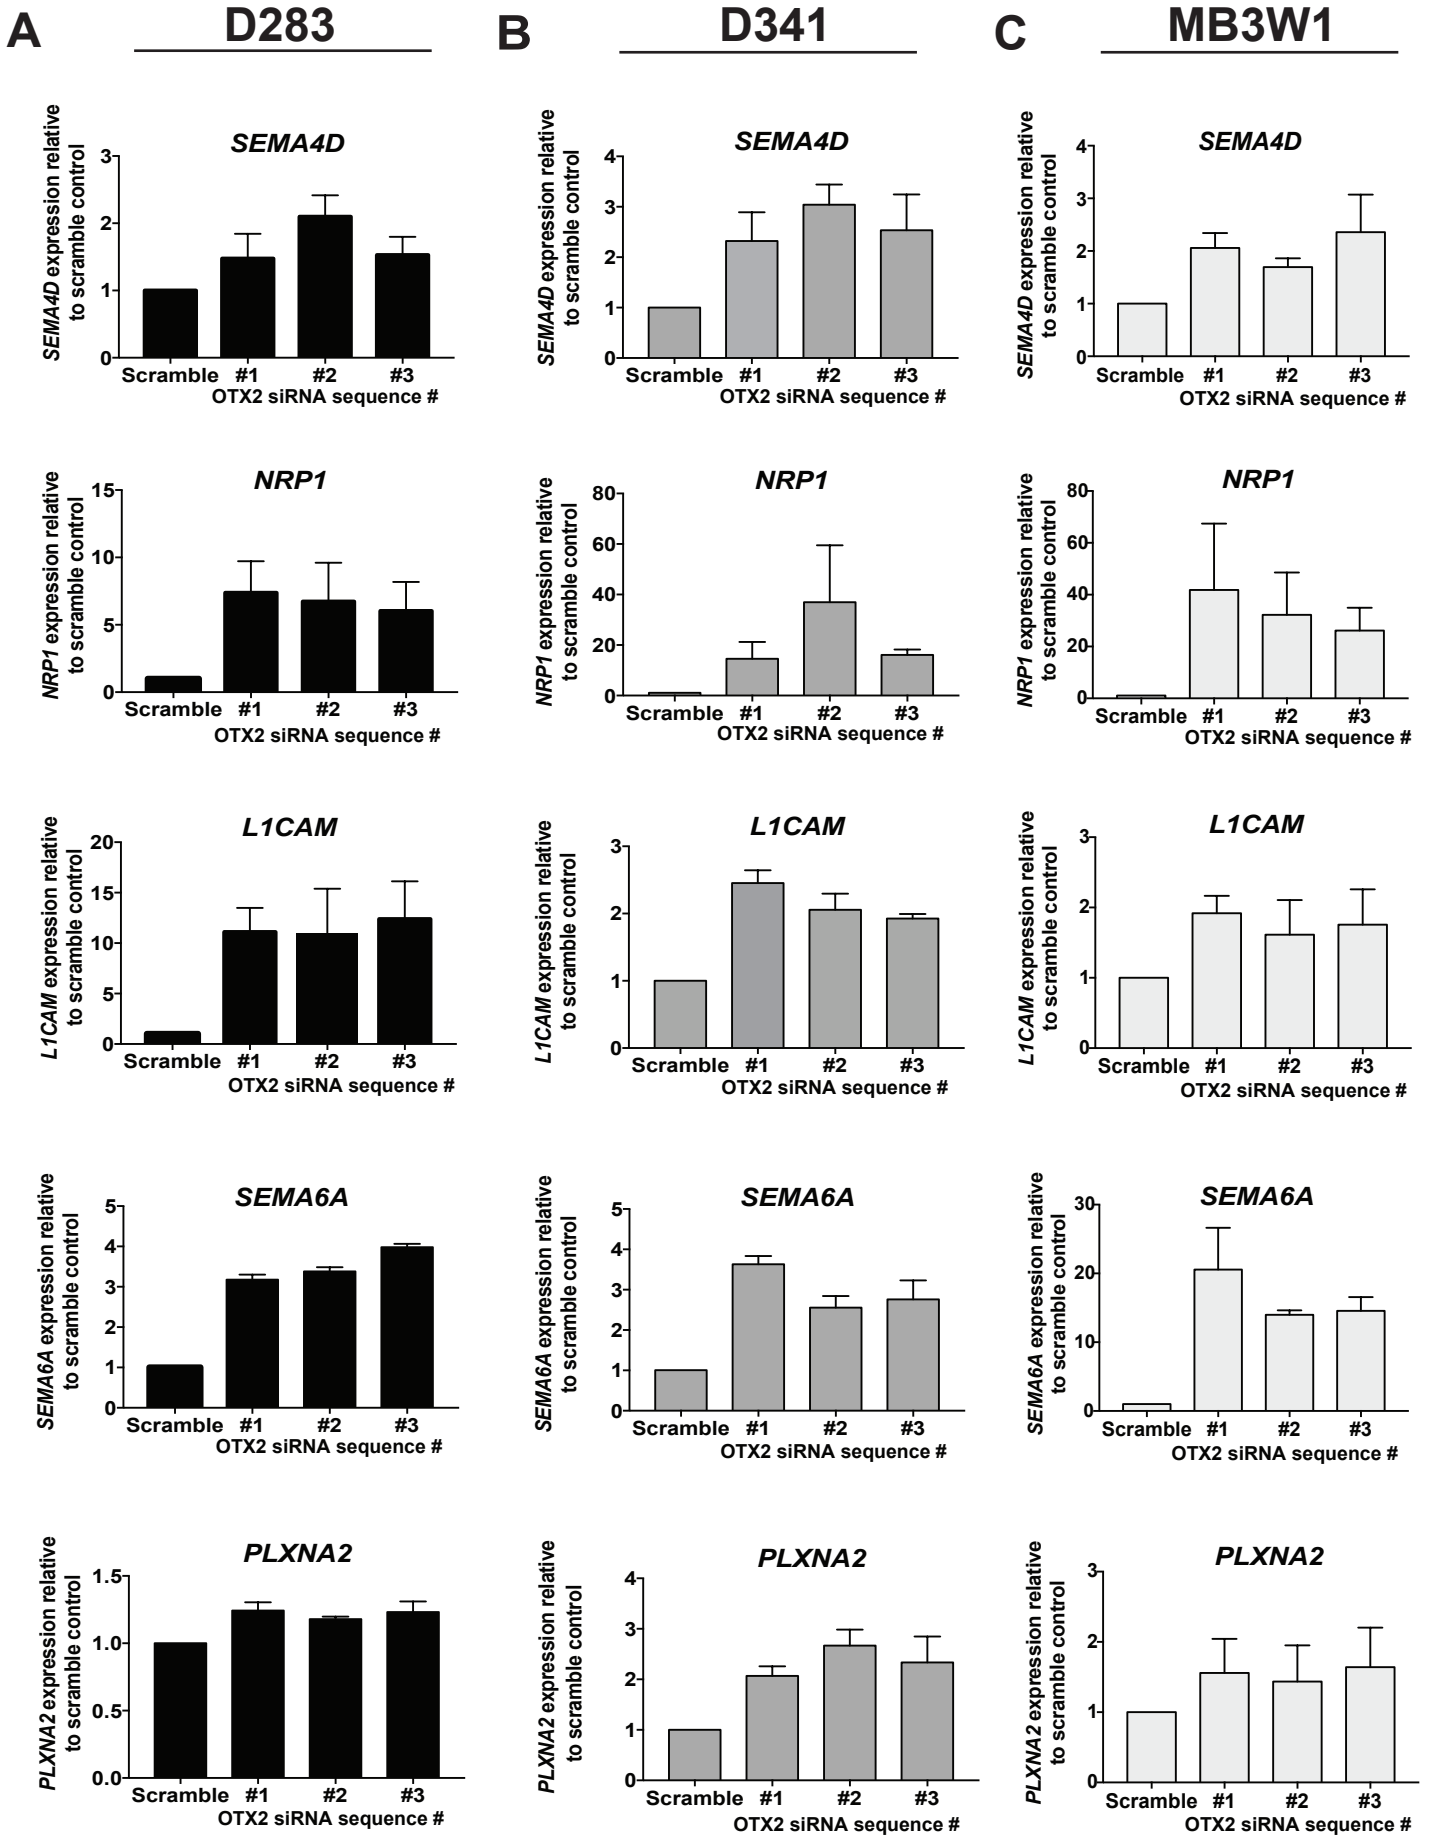

**A** **D283**

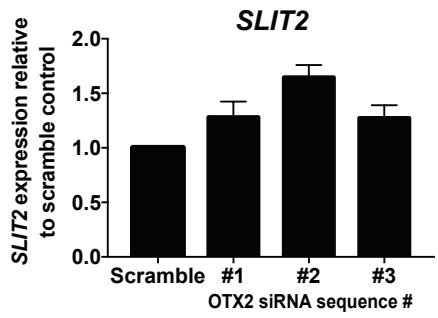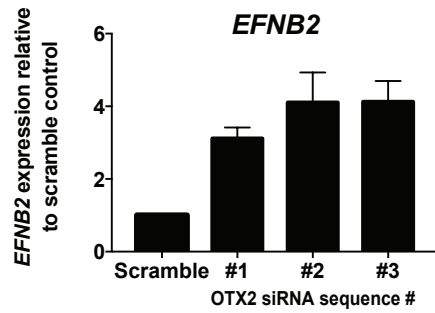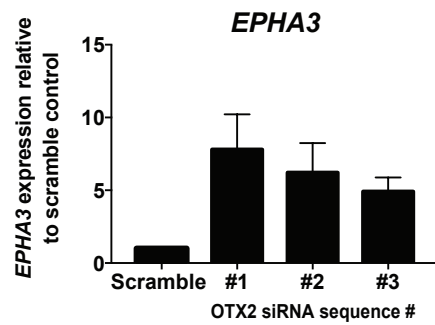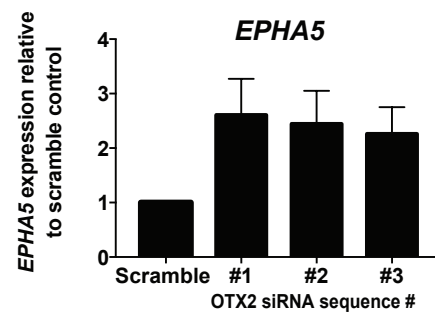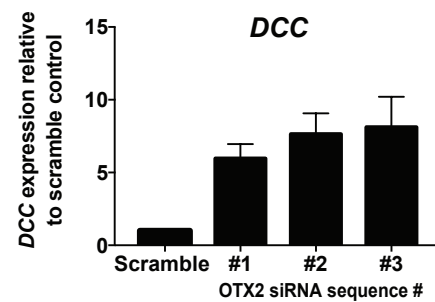

**B** **D341**

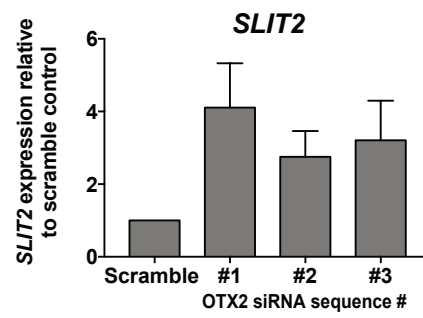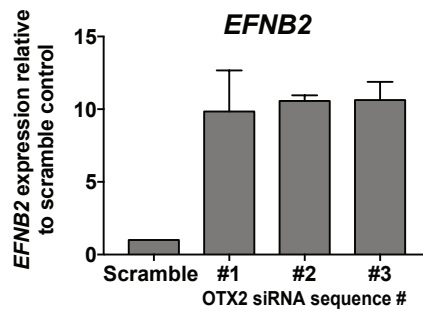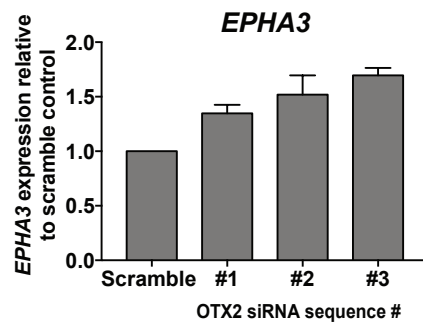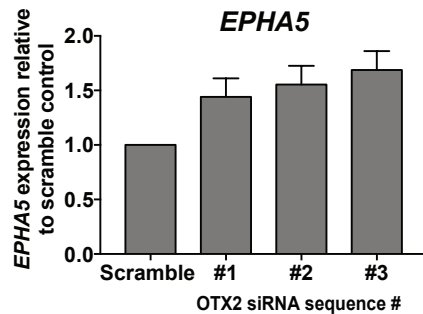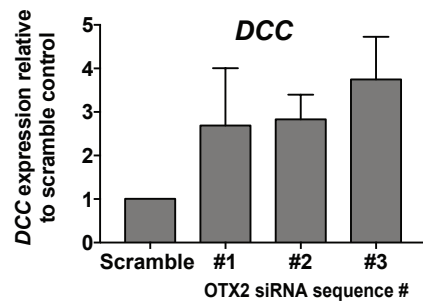

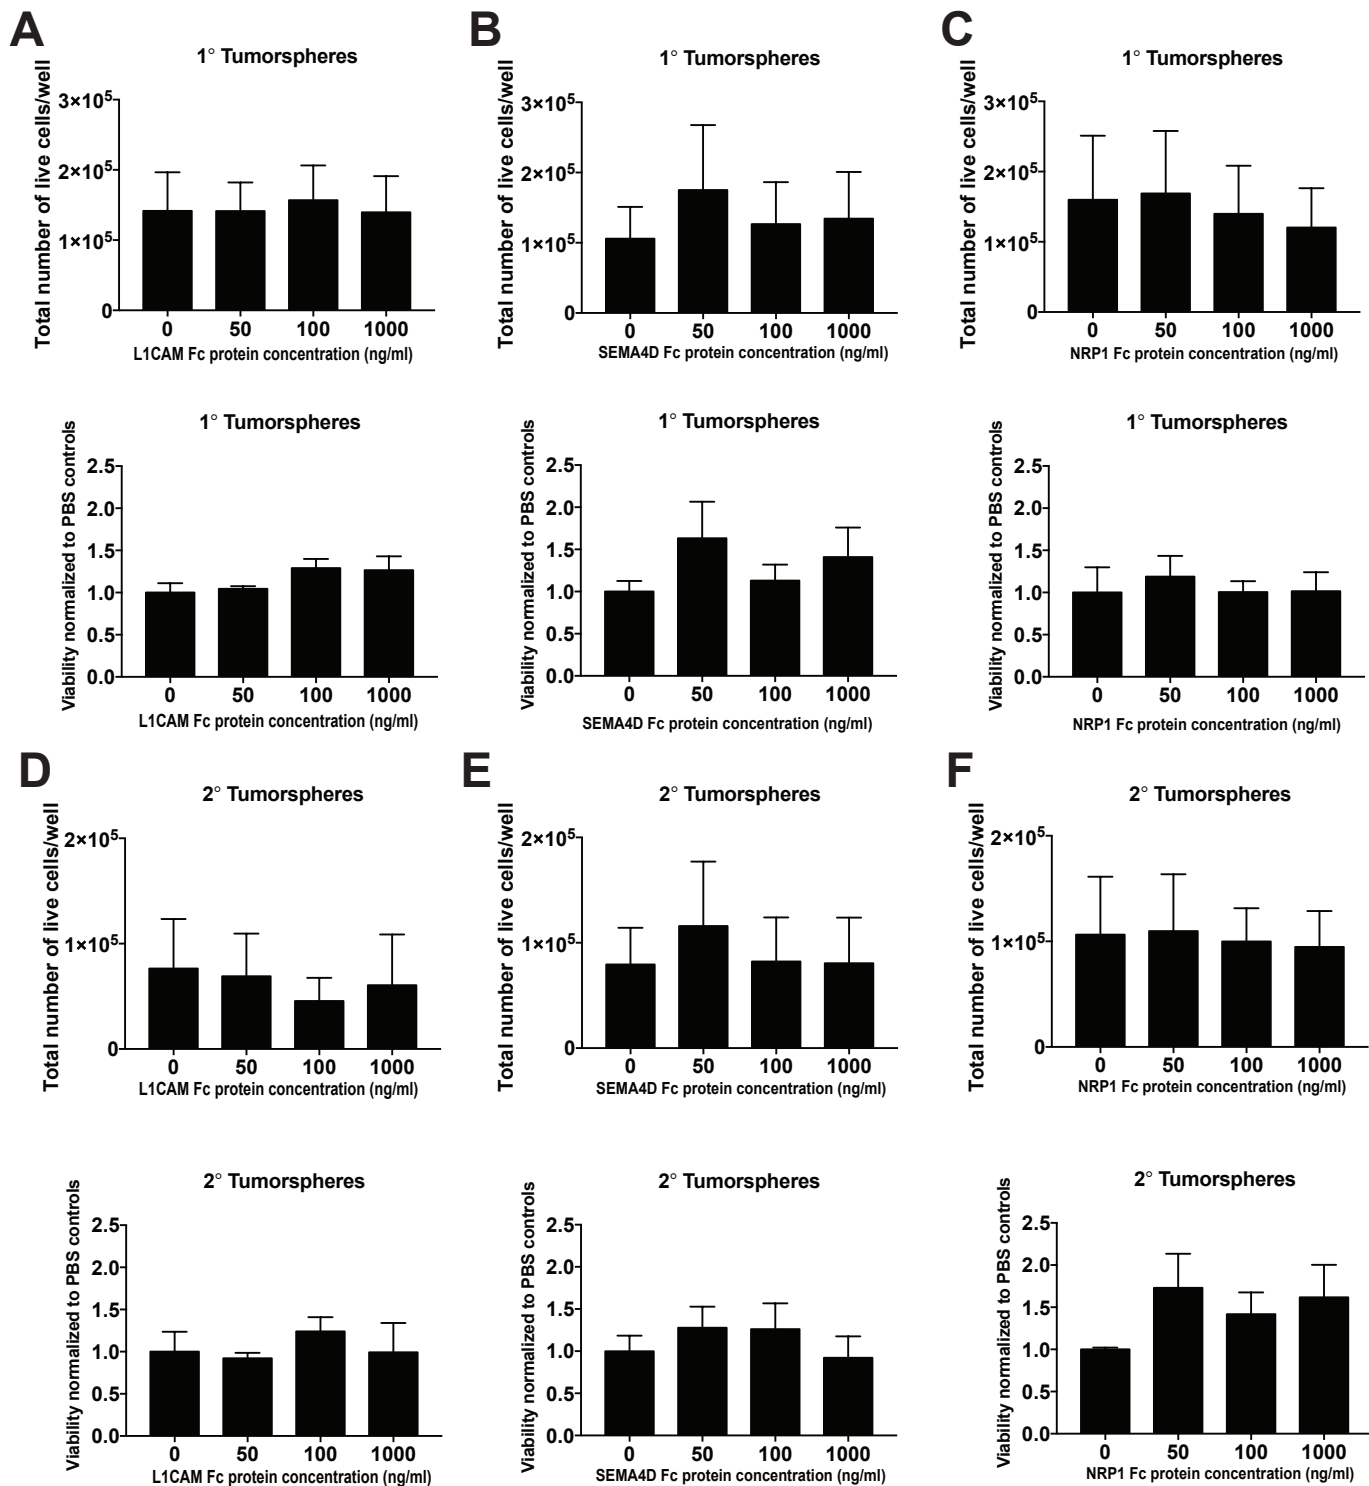

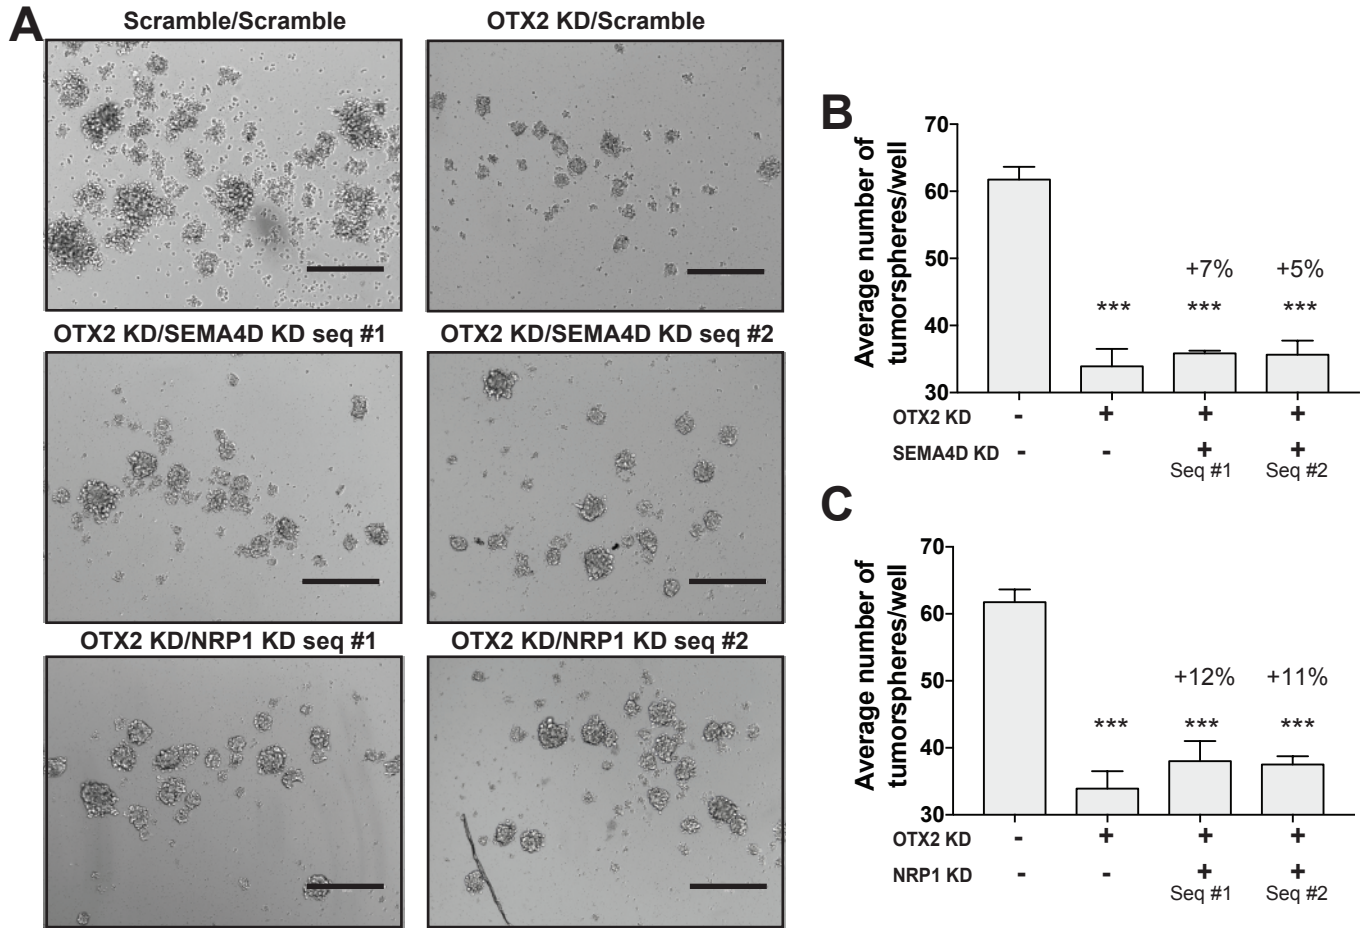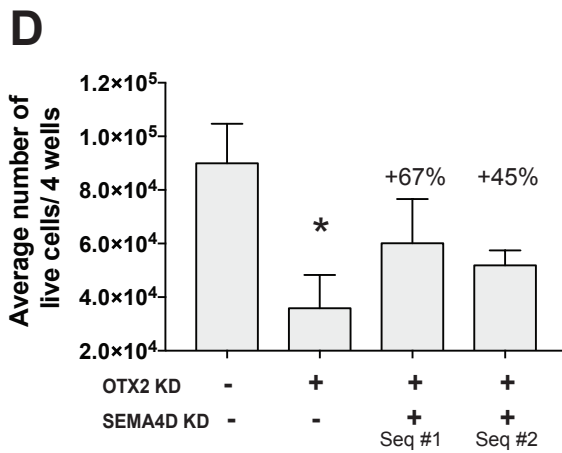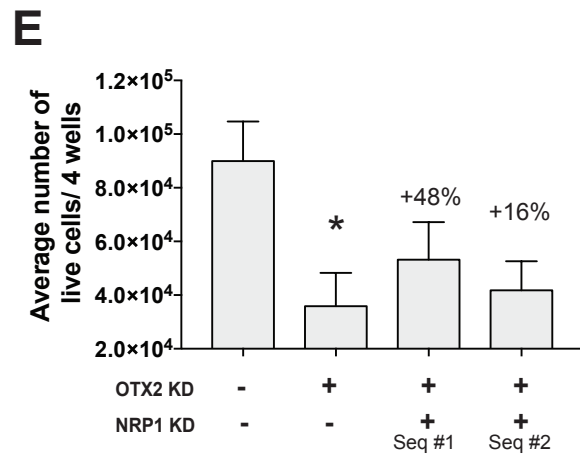



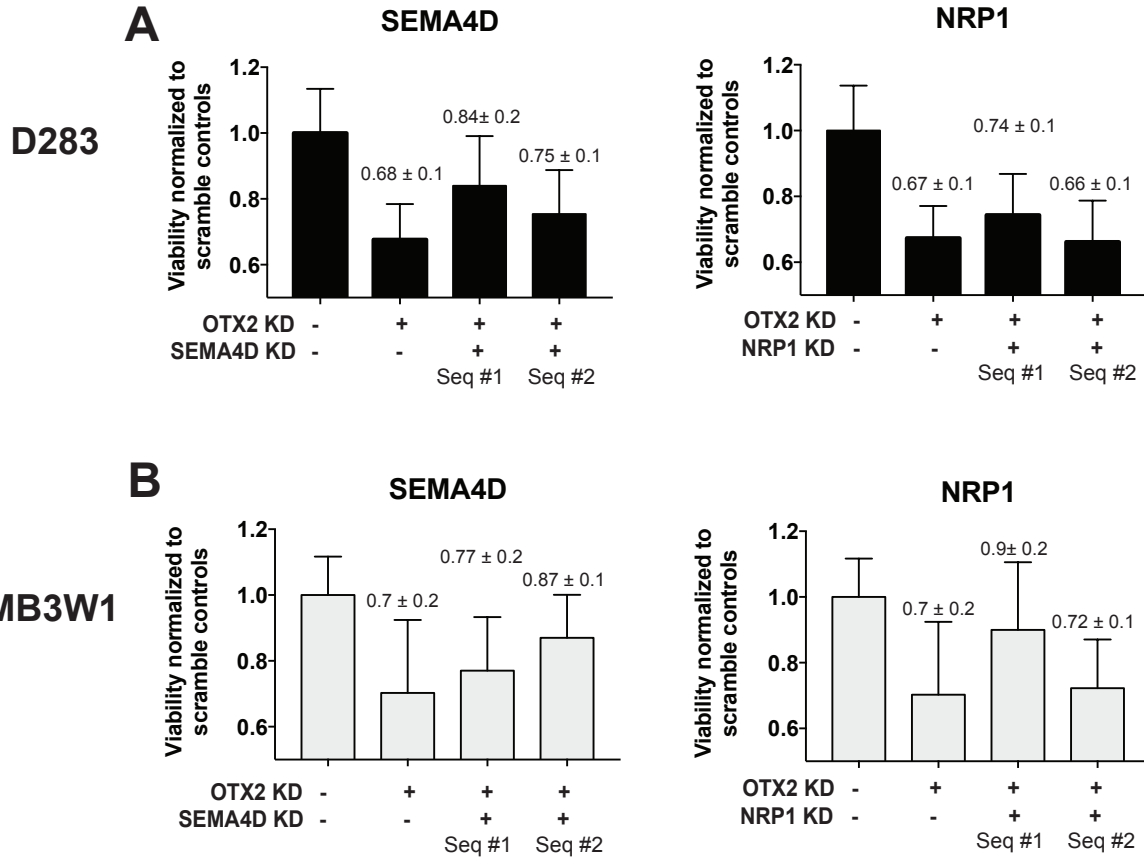

**Supplementary Table 1:** List of antibodies and concentrations used for Western blots

| <b>Gene</b>                                               | <b>Concentration</b> | <b>Source and catalogue number</b>                      |
|-----------------------------------------------------------|----------------------|---------------------------------------------------------|
| <b>β-actin</b>                                            | 1:1000               | Abcam Inc., (ab8226)                                    |
| <b>SEMA4D</b>                                             | 1:500                | Abcam Inc., (ab134128)                                  |
| <b>L1CAM</b>                                              | 1:500                | Gene Tex, (GTX23200)                                    |
| <b>NRP1</b>                                               | 1:500                | Abcam Inc., (ab81321)                                   |
| <b>βIII Tubulin</b>                                       | 1:1000               | R&D Systems, (MAB1195)                                  |
| <b>OTX2</b>                                               | 1:500                | Abcam Inc., (ab21990)                                   |
| <b>RHO</b>                                                | 1:500                | Thermo Fisher, (1862332)                                |
| <b>Peroxidase AffiniPure Donkey Anti-Rabbit IgG (H+L)</b> | 1:5000               | Jackson ImmunoResearch Laboratories Inc., (711-035-152) |
| <b>Goat Anti-Mouse IgG H&amp;L (HRP)</b>                  | 1:5000               | Abcam Inc., (ab6789)                                    |

**Supplementary Table 2:** List of primer sequences used for qPCR

| <b>Gene</b>          | <b>Forward sequence</b>        | <b>Reverse sequence</b>       |
|----------------------|--------------------------------|-------------------------------|
| <b><i>GAPDH</i></b>  | 3'-GAAATCCCATCACCATCTTCCAGG-5' | 3'-GCAAATGAGCCCCAGCCT TCTC-5' |
| <b><i>OTX2</i></b>   | 5'-GAGGTGGCACTGAAAATCAAC-3'    | 5'-TCTTCTTTTTGGCAGGTCTCA-3'   |
| <b><i>TUJ1</i></b>   | 5'-GGCCTTTGGACATCTCTTCA-3'     | 5'-TCGCAGTTTTCACACTCCTTC-3'   |
| <b><i>MAP2</i></b>   | 5'-ATTCTGGCAGCAGTTCTCAA-3'     | 5'-TGCTTCCTCGGTTAGAGACAA-3'   |
| <b><i>SEMA4D</i></b> | 5'-CGTCATGGTTGATGGAGAACT-3'    | 5'-AGCCAAGGGATTGCATATTCT-3'   |
| <b><i>L1CAM</i></b>  | 5'-AAATGGCTGTGAAGACCAATG-3'    | 5'-GATGAAGCAGAGGATGAGCAG-3'   |
| <b><i>NRP1</i></b>   | 5'-CGATTTGGAGGACAGAGACTG-3'    | 5'-GGGGCTATCTTTCCACAGAAC-3'   |
| <b><i>SEMA6A</i></b> | 5'-TTTGTTCAAGCCGTGGATTAC-3'    | 5'-GCCACTCTTGGGAAAACCTACC-3'  |
| <b><i>PLXNA2</i></b> | 5'-ACCATCACACAGGTCAAGGAG-3'    | 5'-CACTCCAAGTCCATGTCCACT-3'   |
| <b><i>SLIT2</i></b>  | 5'-TGAATTTACCGTGTGGAAGC-3'     | 5'-CAGATGCTCCTTCAAATGCTC-3'   |
| <b><i>DCC</i></b>    | 5'-TACTGGACCACCTTCCAACCTG-3'   | 5'-CCTCACATGAAGAGAGCTTGG-3'   |
| <b><i>EPHA3</i></b>  | 5'-GGAAGAGATCAGTGGTGTGGA-3'    | 5'-TTTTGACTGTGGTCCATGACA-3'   |
| <b><i>EPHA5</i></b>  | 5'-ACAAAGGAAGCCAAATCACCT-3'    | 5'-GGTAGAAACCCAAAGGCAGAC-3'   |
| <b><i>EPHB2</i></b>  | 5'-GACTCCACTACAGAGACTGCT-3'    | 5'-TCTCATCGTAGCCACTCACCT-3'   |

**Supplementary Table 3:** Neuronal differentiation genes that are significantly and differentially expressed following OTX2 knockdown in D283 tumorspheres

| <b>Gene Assignment</b> | <b>Predictive effect on neuronal differentiation<br/>(based on measurement direction and literature compiled in<br/>Ingenuity® Knowledge Base)</b> | <b>Fold change</b> |
|------------------------|----------------------------------------------------------------------------------------------------------------------------------------------------|--------------------|
| <i>DPYSL2</i>          | Increased                                                                                                                                          | 2.284692494        |
| <i>NEUROD2</i>         | Increased                                                                                                                                          | 2.470837274        |
| <i>NTRK3</i>           | Increased                                                                                                                                          | 3.721798631        |
| <i>HMGB2</i>           | Increased                                                                                                                                          | 0.334250124        |
| <i>EFNA3</i>           | Increased                                                                                                                                          | 3.294364069        |
| <i>GAP43</i>           | Increased                                                                                                                                          | 10.4468783         |
| <i>MID1</i>            | Increased                                                                                                                                          | 0.398320048        |
| <i>NRXN1</i>           | Increased                                                                                                                                          | 7.459091891        |
| <i>NSG1</i>            | Increased                                                                                                                                          | 2.187070915        |
| <i>CNR1</i>            | Increased                                                                                                                                          | 9.787904329        |
| <i>EPHA4</i>           | Increased                                                                                                                                          | 2.713208655        |
| <i>LRP1</i>            | Increased                                                                                                                                          | 2.435132037        |
| <i>NR2F1</i>           | Increased                                                                                                                                          | 3.140512475        |
| <i>KLF7</i>            | Increased                                                                                                                                          | 2.797232165        |
| <i>DLG5</i>            | Increased                                                                                                                                          | 2.100889088        |
| <i>ACTL6B</i>          | Increased                                                                                                                                          | 2.239225777        |
| <i>CNTNAP2</i>         | Increased                                                                                                                                          | 9.493894381        |
| <i>NCAM2</i>           | Increased                                                                                                                                          | 13.78473856        |
| <i>TSC1</i>            | Increased                                                                                                                                          | 2.037782393        |
| <i>PAX6</i>            | Increased                                                                                                                                          | 3.031433133        |
| <i>RELN</i>            | Increased                                                                                                                                          | 4.00277355         |
| <i>SEMA6A</i>          | Increased                                                                                                                                          | 5.544279543        |
| <i>NUMBL</i>           | Increased                                                                                                                                          | 2.0265138          |
| <i>SDK1</i>            | Increased                                                                                                                                          | 2.396618043        |
| <i>CRMP1</i>           | Increased                                                                                                                                          | 8.190775203        |
| <i>DPYSL3</i>          | Increased                                                                                                                                          | 2.261061134        |
| <i>SNCA</i>            | Increased                                                                                                                                          | 5.95045505         |
| <i>DPYSL5</i>          | Increased                                                                                                                                          | 2.223758315        |
| <i>CIT</i>             | Increased                                                                                                                                          | 0.377356492        |
| <i>KIDINS220</i>       | Increased                                                                                                                                          | 2.979354926        |
| <i>SLIT2</i>           | Increased                                                                                                                                          | 3.365917929        |
| <i>KIF3A</i>           | Increased                                                                                                                                          | 2.844154821        |
| <i>GRIA1</i>           | Increased                                                                                                                                          | 6.520578659        |
| <i>BCL2</i>            | Increased                                                                                                                                          | 2.63170905         |
| <i>FNBP1</i>           | Increased                                                                                                                                          | 2.488023307        |
| <i>KIF1A</i>           | Increased                                                                                                                                          | 3.38932974         |
| <i>PDGFRA</i>          | Increased                                                                                                                                          | 4.982949662        |
| <i>RIMS1</i>           | Increased                                                                                                                                          | 4.161201066        |
| <i>APP</i>             | Increased                                                                                                                                          | 2.360348687        |
| <i>KALRN</i>           | Increased                                                                                                                                          | 4.806544198        |
| <i>ELAVL4</i>          | Increased                                                                                                                                          | 26.6857934         |
| <i>FYN</i>             | Increased                                                                                                                                          | 3.280691645        |

|                 |           |             |
|-----------------|-----------|-------------|
| <i>mir-181</i>  | Increased | 2.987626914 |
| <i>CAMK4</i>    | Increased | 3.431882122 |
| <i>TRIP10</i>   | Increased | 0.219912269 |
| <i>CAMK1G</i>   | Increased | 3.020945171 |
| <i>NEUROD1</i>  | Increased | 2.193143177 |
| <i>CDK5R1</i>   | Increased | 2.756810306 |
| <i>ADGRB2</i>   | Increased | 2.494931144 |
| <i>MAPT</i>     | Increased | 4.17564771  |
| <i>NEUROG2</i>  | Increased | 2.797232165 |
| <i>SEMA4D</i>   | Increased | 3.45575275  |
| <i>HES1</i>     | Increased | 0.400257405 |
| <i>ID1</i>      | Increased | 0.4181232   |
| <i>NEFH</i>     | Increased | 0.291587342 |
| <i>RYR2</i>     | Increased | 11.03488737 |
| <i>TNFRSF21</i> | Increased | 0.494142826 |
| <i>PRKCE</i>    | Increased | 3.396384986 |
| <i>TBR1</i>     | Increased | 2.698205069 |
| <i>CHRNA1</i>   | Increased | 0.410940094 |
| <i>NEUROD6</i>  | Increased | 2.946495372 |
| <i>SV2A</i>     | Increased | 2.352182501 |
| <i>MAP6</i>     | Increased | 12.92417244 |
| <i>ADGRL3</i>   | Increased | 10.70342044 |
| <i>PCYT1B</i>   | Increased | 2.200757219 |
| <i>LRRTM2</i>   | Increased | 3.415270858 |
| <i>ASCL1</i>    | Increased | 3.640155296 |
| <i>ADGRB3</i>   | Increased | 2.040609318 |
| <i>CLSTN2</i>   | Increased | 6.315951094 |
| <i>SOX11</i>    | Increased | 2.380063393 |
| <i>NLGN3</i>    | Increased | 2.136130816 |
| <i>DAGLA</i>    | Increased | 2.319799309 |
| <i>SLITRK5</i>  | Increased | 2.265767771 |
| <i>CAPRN2</i>   | Increased | 2.926142441 |
| <i>TENM4</i>    | Increased | 8.24774655  |
| <i>LRRN3</i>    | Increased | 6.050271989 |
| <i>FLRT1</i>    | Increased | 4.23393758  |
| <i>CLSTN3</i>   | Increased | 2.233025924 |
| <i>LRRTM1</i>   | Increased | 4.334903867 |
| <i>CBLN2</i>    | Increased | 2.11696879  |
| <i>NEUROD4</i>  | Increased | 4.401514437 |
| <i>RIMS3</i>    | Increased | 2.713208655 |
| <i>EPHB2</i>    | Increased | 2.72829567  |
| <i>SEPT4</i>    | Decreased | 0.276241121 |
| <i>ERBB2</i>    | Decreased | 0.438910899 |
| <i>SULF1</i>    | Decreased | 0.458819941 |
| <i>MUSK</i>     | Decreased | 0.368311921 |
| <i>BMP7</i>     | Decreased | 0.414659773 |
| <i>EEF2K</i>    | Decreased | 0.281654807 |
| <i>PPP3CA</i>   | Decreased | 2.488023307 |
| <i>RIT1</i>     | Decreased | 2.051956291 |
| <i>DOCK10</i>   | Decreased | 0.403880389 |

|                 |           |             |
|-----------------|-----------|-------------|
| <i>SMAD3</i>    | Decreased | 0.44844408  |
| <i>TGFB1</i>    | Decreased | 0.279709275 |
| <i>FGF2</i>     | Decreased | 0.281069731 |
| <i>FGFR2</i>    | Decreased | 0.248445273 |
| <i>SDC2</i>     | Decreased | 0.492433221 |
| <i>COL25A1</i>  | Decreased | 0.5         |
| <i>GDI1</i>     | Decreased | 2.09216988  |
| <i>KIF23</i>    | Decreased | 0.146807746 |
| <i>DCX</i>      | Decreased | 5.241573615 |
| <i>SLC12A2</i>  | Decreased | 0.334713814 |
| <i>SERPINF1</i> | Decreased | 0.195467411 |
| <i>SYNGAP1</i>  | Decreased | 2.522754818 |
| <i>RTN4</i>     | Decreased | 2.057653416 |
| <i>CBLN1</i>    | Decreased | 0.342695701 |
| <i>GAS7</i>     | Decreased | 0.185436867 |
| <i>RAPGEF2</i>  | Decreased | 3.655325801 |
| <i>NTF3</i>     | Decreased | 0.321078952 |
| <i>DCLK1</i>    | Decreased | 4           |
| <i>RYR1</i>     | Decreased | 0.483973513 |
| <i>CHRNA7</i>   | Decreased | 0.295452887 |
| <i>GLI3</i>     | Decreased | 0.243163737 |
| <i>KLF9</i>     | Decreased | 0.219912269 |
| <i>NGF</i>      | Decreased | 0.220064753 |
| <i>GEM</i>      | Decreased | 0.268501118 |
| <i>L1CAM</i>    | Decreased | 5.105315075 |
| <i>MYO5A</i>    | Decreased | 2.324628215 |
| <i>IGF1</i>     | Decreased | 0.467163673 |
| <i>DOCK1</i>    | Decreased | 0.464902471 |
| <i>MAPK8IP1</i> | Decreased | 2.67585511  |
| <i>PARD3</i>    | Decreased | 0.431071773 |
| <i>PLPPR5</i>   | Decreased | 0.336108749 |
| <i>RAB17</i>    | Decreased | 0.16747295  |
| <i>REM2</i>     | Decreased | 2.270484204 |
| <i>ROBO2</i>    | Decreased | 2.406606052 |
| <i>MDGA1</i>    | Decreased | 2.236123702 |
| <i>BARHL2</i>   | Affected  | 2.202283196 |
| <i>LRP4</i>     | Affected  | 0.400812665 |
| <i>NYAP2</i>    | Affected  | 9.553305497 |
| <i>CELSR2</i>   | Affected  | 4.597979392 |
| <i>CPT1C</i>    | Affected  | 2.236123702 |
| <i>PCDHB9</i>   | Affected  | 2.020902893 |
| <i>RNF165</i>   | Affected  | 3.073750363 |
| <i>PRICKLE2</i> | Affected  | 0.267757706 |
| <i>BRSK1</i>    | Affected  | 2.043440165 |
| <i>PCDHB14</i>  | Affected  | 3.673104649 |
| <i>ATL1</i>     | Affected  | 2.37676621  |
| <i>PDZRN3</i>   | Affected  | 0.321747312 |
| <i>GPM6A</i>    | Affected  | 2.430073584 |
| <i>LRRC7</i>    | Affected  | 22.7059737  |
| <i>RUFY3</i>    | Affected  | 2.496661098 |

|                 |          |             |
|-----------------|----------|-------------|
| <i>SHTN1</i>    | Affected | 4.717426369 |
| <i>NSMF</i>     | Affected | 4.319906239 |
| <i>CCDC88A</i>  | Affected | 2.069095163 |
| <i>BBS4</i>     | Affected | 0.395842933 |
| <i>CLMN</i>     | Affected | 0.221288441 |
| <i>FEZF2</i>    | Affected | 2.687006851 |
| <i>SEZ6</i>     | Affected | 2.944453724 |
| <i>TULP1</i>    | Affected | 0.385552706 |
| <i>PCDH8</i>    | Affected | 2.360348687 |
| <i>CACNA1F</i>  | Affected | 0.406126198 |
| <i>CNTN4</i>    | Affected | 5.158673003 |
| <i>CPEB4</i>    | Affected | 2.150988781 |
| <i>ATCAY</i>    | Affected | 11.08855909 |
| <i>PREX2</i>    | Affected | 0.441351498 |
| <i>PLXND1</i>   | Affected | 2.284692494 |
| <i>LRRC4C</i>   | Affected | 3.69609029  |
| <i>CASP6</i>    | Affected | 0.480630464 |
| <i>GABRA5</i>   | Affected | 0.252437824 |
| <i>GFRA1</i>    | Affected | 2.615342697 |
| <i>SPR</i>      | Affected | 0.272815969 |
| <i>CACNA2D2</i> | Affected | 8.299359493 |
| <i>HSPB1</i>    | Affected | 0.407253782 |
| <i>SYN1</i>     | Affected | 2.599078125 |
| <i>LZTS1</i>    | Affected | 2.350552657 |
| <i>MAP1B</i>    | Affected | 2.711328654 |
| <i>NPTXR</i>    | Affected | 22.54913208 |
| <i>SLC1A3</i>   | Affected | 0.257563488 |
| <i>NCAN</i>     | Affected | 4.422922613 |
| <i>SHC1</i>     | Affected | 0.486327474 |
| <i>NOTCH1</i>   | Affected | 0.384751805 |
| <i>PAR6B</i>    | Affected | 0.283417353 |
| <i>ETV4</i>     | Affected | 0.483973513 |
| <i>SYP</i>      | Affected | 2.125791349 |
| <i>DMD</i>      | Affected | 0.498615626 |
| <i>LAMA1</i>    | Affected | 0.242322454 |
| <i>SNAP91</i>   | Affected | 4.948529915 |
| <i>CACNB4</i>   | Affected | 0.489370825 |
| <i>SNCB</i>     | Affected | 4.319906239 |
| <i>MPP5</i>     | Affected | 0.340328529 |
| <i>CD44</i>     | Affected | 2.615342697 |
| <i>GJA1</i>     | Affected | 0.095127086 |
| <i>BTG3</i>     | Affected | 0.334250124 |
| <i>HCN1</i>     | Affected | 3.048289661 |
| <i>NRG1</i>     | Affected | 3.60500185  |
| <i>PCDHB13</i>  | Affected | 4.456774603 |
| <i>CXCR4</i>    | Affected | 0.35013908  |
| <i>EPB41L3</i>  | Affected | 3.977880675 |
| <i>DNER</i>     | Affected | 4.707626949 |
| <i>NR4A2</i>    | Affected | 3.906834116 |
| <i>CTNNA2</i>   | Affected | 2.327853069 |

|                 |          |             |
|-----------------|----------|-------------|
| <i>CAST</i>     | Affected | 0.41065535  |
| <i>TP73</i>     | Affected | 5.045509635 |
| <i>SPTBN4</i>   | Affected | 2.507066041 |
| <i>NRP2</i>     | Affected | 5.392670927 |
| <i>PLXNA3</i>   | Affected | 3.431882122 |
| <i>ONECUT1</i>  | Affected | 4.352969767 |
| <i>THRA</i>     | Affected | 3.928558381 |
| <i>RAB3A</i>    | Affected | 2.353813474 |
| <i>ERBB3</i>    | Affected | 0.416099367 |
| <i>ARHGEF28</i> | Affected | 2.170458744 |
| <i>MYOD1</i>    | Affected | 0.172898829 |
| <i>LOX</i>      | Affected | 0.35404386  |
| <i>RDX</i>      | Affected | 0.498615626 |
| <i>CADM1</i>    | Affected | 2.096524951 |
| <i>C3</i>       | Affected | 0.190650207 |
| <i>UNC5A</i>    | Affected | 3.647732662 |
| <i>UGT8</i>     | Affected | 0.335875856 |
| <i>FZD5</i>     | Affected | 0.456599125 |
| <i>VIM</i>      | Affected | 0.355765865 |
| <i>OPTN</i>     | Affected | 3.518596304 |
| <i>WNT7B</i>    | Affected | 3.035638506 |
| <i>VLDLR</i>    | Affected | 0.280097304 |
| <i>DISC1</i>    | Affected | 0.278548413 |
| <i>COL4A1</i>   | Affected | 0.240148716 |
| <i>PLPPR4</i>   | Affected | 0.409802304 |
| <i>DCC</i>      | Affected | 19.91798777 |
| <i>NRP1</i>     | Affected | 4.525257851 |
| <i>GABRG2</i>   | Affected | 5.172995728 |
| <i>ARHGAP33</i> | Affected | 3.786854525 |
| <i>CLU</i>      | Affected | 0.393926943 |
| <i>CACNA1S</i>  | Affected | 0.47204621  |
| <i>RAB29</i>    | Affected | 0.206183387 |
| <i>MAP2</i>     | Affected | 17.31559431 |
| <i>TOP2B</i>    | Affected | 2.046274939 |
| <i>PRDM1</i>    | Affected | 0.285982743 |
| <i>CDC20</i>    | Affected | 0.178376813 |
| <i>LIF</i>      | Affected | 0.414659773 |
| <i>SRCIN1</i>   | Affected | 2.633533844 |
| <i>SRGAP2</i>   | Affected | 2.106722072 |
| <i>SIPA1L1</i>  | Affected | 2.049113646 |
| <i>HERC1</i>    | Affected | 2.724516069 |
| <i>PDLIM5</i>   | Affected | 0.454074209 |
| <i>EFNB2</i>    | Affected | 8.456144324 |
| <i>WEE1</i>     | Affected | 0.340800652 |
| <i>SIX4</i>     | Affected | 0.346517471 |
| <i>BMP2</i>     | Affected | 0.166200889 |
| <i>CACNA1A</i>  | Affected | 14.89751712 |
| <i>LYN</i>      | Affected | 0.185436867 |
| <i>PITPNA</i>   | Affected | 0.47237352  |
| <i>NR2F6</i>    | Affected | 0.469435874 |



|                |          |             |
|----------------|----------|-------------|
| <i>NR1D1</i>   | Affected | 2.30697121  |
| <i>KIF20B</i>  | Affected | 0.33985706  |
| <i>PAK3</i>    | Affected | 5.540437872 |
| <i>FNBP1L</i>  | Affected | 2.648177821 |
| <i>PCDHB8</i>  | Affected | 2.049113646 |
| <i>PCDHB10</i> | Affected | 4.23393758  |
| <i>PCDHB11</i> | Affected | 2.873880353 |
| <i>EPHA3</i>   | Affected | 35.97692556 |
| <i>LAMB2</i>   | Affected | 0.404160434 |
| <i>LINGO1</i>  | Affected | 2.153972752 |

\*\*Note: 85 of 252 differentially expressed genes have measurement direction consistent with an increase in neuronal development or differentiation, Z-score: 3.2

**Supplementary Table 4:** Axon guidance genes that are significantly and differentially expressed following OTX2 knockdown in D283 tumorspheres

| <b>Gene Assignment</b> | <b>Entrez Gene Name</b>                                                                 | <b>Fold change</b> |
|------------------------|-----------------------------------------------------------------------------------------|--------------------|
| <i>ABLIM3</i>          | actin binding LIM protein family, member 3                                              | 0.358488812        |
| <i>ADAM11</i>          | ADAM metallopeptidase domain 11                                                         | 4.629960868        |
| <i>ADAM23</i>          | ADAM metallopeptidase domain 23                                                         | 2.298989696        |
| <i>ADAMTS7</i>         | ADAM metallopeptidase with thrombospondin type 1 motif, 7                               | 2.484576564        |
| <i>ARPC1B</i>          | actin related protein 2/3 complex, subunit 1B, 41kDa                                    | 0.467163673        |
| <i>BMP1</i>            | bone morphogenetic protein 1                                                            | 2.38998241         |
| <i>BMP2</i>            | bone morphogenetic protein 2                                                            | 0.166200889        |
| <i>BMP7</i>            | bone morphogenetic protein 7                                                            | 0.414659773        |
| <i>C9orf3</i>          | chromosome 9 open reading frame 3                                                       | 0.428390977        |
| <i>CXCR4</i>           | chemokine (C-X-C motif) receptor 4                                                      | 0.35013908         |
| <i>DCC</i>             | DCC netrin 1 receptor                                                                   | 19.91798777        |
| <i>DOCK1</i>           | dedicator of cytokinesis 1                                                              | 0.464902471        |
| <i>DPYSL2</i>          | dihydropyrimidinase-like 2                                                              | 2.284692494        |
| <i>DPYSL5</i>          | dihydropyrimidinase-like 5                                                              | 2.223758315        |
| <i>EFNA3</i>           | ephrin-A3                                                                               | 3.294364069        |
| <i>EFNA4</i>           | ephrin-A4                                                                               | 0.178624267        |
| <i>EFNB2</i>           | ephrin-B2                                                                               | 8.456144324        |
| <i>EPHA2</i>           | EPH receptor A2                                                                         | 0.18595172         |
| <i>EPHA3</i>           | EPH receptor A3                                                                         | 35.97692556        |
| <i>EPHA4</i>           | EPH receptor A4                                                                         | 2.713208655        |
| <i>EPHA5</i>           | EPH receptor A5                                                                         | 29.79503423        |
| <i>EPHB2</i>           | EPH receptor B2                                                                         | 2.72829567         |
| <i>EPHB4</i>           | EPH receptor B4                                                                         | 0.273763118        |
| <i>ERBB2</i>           | erb-b2 receptor tyrosine kinase 2                                                       | 0.438910899        |
| <i>FYN</i>             | FYN proto-oncogene, Src family tyrosine kinase                                          | 3.280691645        |
| <i>FZD1</i>            | frizzled class receptor 1                                                               | 0.411510173        |
| <i>FZD5</i>            | frizzled class receptor 5                                                               | 0.456599125        |
| <i>FZD7</i>            | frizzled class receptor 7                                                               | 0.08207007         |
| <i>GLI3</i>            | GLI family zinc finger 3                                                                | 0.243163737        |
| <i>GNAO1</i>           | guanine nucleotide binding protein (G protein), alpha activating activity polypeptide O | 5.747760706        |
| <i>GNB3</i>            | guanine nucleotide binding protein (G protein), beta polypeptide 3                      | 0.257206677        |
| <i>GNB4</i>            | guanine nucleotide binding protein (G protein), beta polypeptide 4                      | 0.294226684        |
| <i>GNB5</i>            | guanine nucleotide binding protein (G protein), beta 5                                  | 2.131693472        |
| <i>GNG2</i>            | guanine nucleotide binding protein (G protein), gamma 2                                 | 3.020945171        |
| <i>GNG3</i>            | guanine nucleotide binding protein (G protein), gamma 3                                 | 6.143241079        |
| <i>GNG5</i>            | guanine nucleotide binding protein (G protein), gamma 5                                 | 0.40584479         |
| <i>GNG11</i>           | guanine nucleotide binding protein (G protein), gamma 11                                | 0.367801686        |
| <i>GNG12</i>           | guanine nucleotide binding protein (G protein), gamma 12                                | 0.300200857        |
| <i>IGF1</i>            | insulin-like growth factor 1 (somatomedin C)                                            | 0.467163673        |
| <i>ITGA4</i>           | integrin, alpha 4 (antigen CD49D, alpha 4 subunit of VLA-4 receptor)                    | 2.25792881         |
| <i>KALRN</i>           | kalirin, RhoGEF kinase                                                                  | 4.806544198        |
| <i>KLC1</i>            | kinesin light chain 1                                                                   | 2.164449289        |

|                |                                                                                                                  |             |
|----------------|------------------------------------------------------------------------------------------------------------------|-------------|
| <i>L1CAM</i>   | L1 cell adhesion molecule                                                                                        | 5.105315075 |
| <i>LINGO1</i>  | leucine rich repeat and Ig domain containing 1                                                                   | 2.153972752 |
| <i>LRRC4C</i>  | leucine rich repeat containing 4C                                                                                | 3.69609029  |
| <i>MICAL1</i>  | microtubule associated monooxygenase, calponin and LIM domain containing 1                                       | 2.425025638 |
| <i>MYL4</i>    | myosin, light chain 4, alkali; atrial, embryonic                                                                 | 0.357000995 |
| <i>NGF</i>     | nerve growth factor (beta polypeptide)                                                                           | 0.220064753 |
| <i>NRP1</i>    | neuropilin 1                                                                                                     | 4.525257851 |
| <i>NRP2</i>    | neuropilin 2                                                                                                     | 5.392670927 |
| <i>NTF3</i>    | neurotrophin 3                                                                                                   | 0.321078952 |
| <i>NTRK3</i>   | neurotrophic tyrosine kinase, receptor, type 3                                                                   | 3.721798631 |
| <i>PAK3</i>    | p21 protein (Cdc42/Rac)-activated kinase 3                                                                       | 5.540437872 |
| <i>PAK7</i>    | p21 protein (Cdc42/Rac)-activated kinase 7                                                                       | 4.688089135 |
| <i>PAPPA2</i>  | pappalysin 2                                                                                                     | 0.147624083 |
| <i>PLCB4</i>   | phospholipase C, beta 4                                                                                          | 9.428315262 |
| <i>PLCD3</i>   | phospholipase C, delta 3                                                                                         | 0.392292049 |
| <i>PLCD4</i>   | phospholipase C, delta 4                                                                                         | 3.267075964 |
| <i>PLCE1</i>   | phospholipase C, epsilon 1                                                                                       | 0.341036959 |
| <i>PLCG1</i>   | phospholipase C, gamma 1                                                                                         | 2.403272099 |
| <i>PLCL1</i>   | phospholipase C-like 1                                                                                           | 4.500233939 |
| <i>PLXNA2</i>  | plexin A2                                                                                                        | 3.43664302  |
| <i>PLXNA3</i>  | plexin A3                                                                                                        | 3.431882122 |
| <i>PLXND1</i>  | plexin D1                                                                                                        | 2.284692494 |
| <i>PPP3CA</i>  | protein phosphatase 3, catalytic subunit, alpha isozyme                                                          | 2.488023307 |
| <i>PRKAR2B</i> | protein kinase, cAMP-dependent, regulatory, type II, beta                                                        | 2.486299338 |
| <i>PRKCE</i>   | protein kinase C, epsilon                                                                                        | 3.396384986 |
| <i>PRKD3</i>   | protein kinase D3                                                                                                | 0.459456442 |
| <i>PTCH2</i>   | patched 2                                                                                                        | 3.164549205 |
| <i>ROBO2</i>   | roundabout guidance receptor 2                                                                                   | 2.406606052 |
| <i>RRAS</i>    | related RAS viral (r-ras) oncogene homolog                                                                       | 0.323985241 |
| <i>RTN4</i>    | reticulon 4                                                                                                      | 2.057653416 |
| <i>SDC2</i>    | syndecan 2                                                                                                       | 0.492433221 |
| <i>SEMA4D</i>  | sema domain, immunoglobulin domain (Ig), transmembrane domain (TM) and short cytoplasmic domain, (semaphorin) 4D | 3.45575275  |
| <i>SEMA6A</i>  | sema domain, transmembrane domain (TM), and cytoplasmic domain, (semaphorin) 6A                                  | 5.544279543 |
| <i>SEMA6C</i>  | sema domain, transmembrane domain (TM), and cytoplasmic domain, (semaphorin) 6C                                  | 2.8108374   |
| <i>SHC1</i>    | SHC (Src homology 2 domain containing) transforming protein 1                                                    | 0.486327474 |
| <i>SLIT1</i>   | slit guidance ligand 1                                                                                           | 13.04115732 |
| <i>SLIT2</i>   | slit guidance ligand 2                                                                                           | 3.365917929 |
| <i>SMO</i>     | smoothened, frizzled class receptor                                                                              | 0.422786144 |
| <i>SOS2</i>    | son of sevenless homolog 2 (Drosophila)                                                                          | 2.033549347 |
| <i>SRGAP2</i>  | SLIT-ROBO Rho GTPase activating protein 2                                                                        | 2.106722072 |
| <i>TUBB6</i>   | tubulin, beta 6 class V                                                                                          | 0.284204243 |
| <i>TUBB2A</i>  | tubulin, beta 2A class IIa                                                                                       | 2.358713185 |
| <i>TUBB2B</i>  | tubulin, beta 2B class IIb                                                                                       | 2.00416321  |
| <i>TUBB4A</i>  | tubulin, beta 4A class IVa                                                                                       | 2.124318373 |
| <i>UNC5A</i>   | unc-5 netrin receptor A                                                                                          | 3.647732662 |
| <i>UNC5B</i>   | unc-5 netrin receptor B                                                                                          | 2.599078125 |
| <i>UNC5D</i>   | unc-5 netrin receptor D                                                                                          | 8.094825608 |
| <i>WNT7B</i>   | wingless-type MMTV integration site family, member 7B                                                            | 3.035638506 |

**Supplementary Table 5:** Axon guidance pathway genes that were significantly and differentially expressed following OTX2 KD and the number of OTX2 binding peaks /overlaps within -5kb-+2kb of their transcriptional start sites

| Gene Assignment | Fold change | Overlaps/OTX2-binding peaks |
|-----------------|-------------|-----------------------------|
| <i>UNC5B</i>    | 2.599856508 | 5                           |
| <i>SLIT2</i>    | 3.365945926 | 4                           |
| <i>EFNB2</i>    | 8.458995374 | 3                           |
| <i>SEMA6A</i>   | 5.542465942 | 3                           |
| <i>PLXNA2</i>   | 3.436757362 | 3                           |
| <i>LRRC4C</i>   | 3.696844429 | 3                           |
| <i>KLC1</i>     | 2.163857258 | 3                           |
| <i>IGF1</i>     | 0.467094383 | 3                           |
| <i>SHC1</i>     | 0.486217368 | 3                           |
| <i>FZD5</i>     | 0.456667281 | 3                           |
| <i>GNG12</i>    | 0.30012554  | 3                           |
| <i>GNG3</i>     | 6.14369672  | 2                           |
| <i>NRP1</i>     | 4.525936467 | 2                           |
| <i>SEMA6C</i>   | 2.811277756 | 2                           |
| <i>FZD1</i>     | 0.411479558 | 2                           |
| <i>EPHA4</i>    | 2.713058833 | 2                           |
| <i>PLCE1</i>    | 0.340932018 | 2                           |
| <i>PLCD3</i>    | 0.392306551 | 2                           |
| <i>SRGAP2</i>   | 2.107118816 | 2                           |
| <i>NRP2</i>     | 5.392071649 | 2                           |
| <i>PLCL1</i>    | 4.499103846 | 2                           |
| <i>RRAS</i>     | 0.324050897 | 2                           |
| <i>GNG11</i>    | 0.367793953 | 2                           |
| <i>EPHA5</i>    | 29.7964111  | 1                           |
| <i>DCC</i>      | 19.9143847  | 1                           |
| <i>FZD7</i>     | 0.082085886 | 1                           |
| <i>EPHA3</i>    | 35.96546453 | 1                           |
| <i>UNC5D</i>    | 8.093918561 | 1                           |
| <i>PLCB4</i>    | 9.425849634 | 1                           |
| <i>SLIT1</i>    | 13.04052457 | 1                           |
| <i>GNB3</i>     | 0.257122066 | 1                           |
| <i>KALRN</i>    | 4.807760401 | 1                           |
| <i>EPHA2</i>    | 0.185952064 | 1                           |
| <i>BMP2</i>     | 0.166236374 | 1                           |
| <i>CXCR4</i>    | 0.350026972 | 1                           |

|         |             |   |
|---------|-------------|---|
| GNB4    | 0.294242592 | 1 |
| EFNA3   | 3.293833584 | 1 |
| PPP3CA  | 2.488226239 | 1 |
| NGF     | 0.220082042 | 1 |
| PTCH2   | 3.165072031 | 1 |
| UNC5A   | 3.648270412 | 1 |
| MYL4    | 0.356958518 | 1 |
| WNT7B   | 3.035941518 | 1 |
| DPYSL5  | 2.223862104 | 1 |
| TUBB6   | 0.284219872 | 1 |
| EFNA4   | 0.178674171 | 1 |
| PLCD4   | 3.266598176 | 1 |
| SDC2    | 0.492339251 | 1 |
| SOS2    | 2.033516927 | 1 |
| BMP7    | 0.414541181 | 1 |
| MICAL1  | 2.42543301  | 1 |
| GNG5    | 0.405713159 | 1 |
| PRKD3   | 0.45951462  | 1 |
| GNB5    | 2.131834339 | 1 |
| ERBB2   | 0.438769353 | 1 |
| ARPC1B  | 0.46707323  | 1 |
| L1CAM   | 5.106598619 | 0 |
| PAPPA2  | 0.14758633  | 0 |
| GNAO1   | 5.746351854 | 0 |
| PLXNA3  | 3.432025645 | 0 |
| PAK3    | 5.539728734 | 0 |
| PAK7    | 4.687338552 | 0 |
| SEMA4D  | 3.456588028 | 0 |
| ADAM23  | 2.299033785 | 0 |
| EPHB2   | 2.728741378 | 0 |
| SMO     | 0.422761137 | 0 |
| BMP1    | 2.389216627 | 0 |
| ADAM11  | 4.631441635 | 0 |
| DPYSL2  | 2.284545748 | 0 |
| LINGO1  | 2.15434803  | 0 |
| ADAMTS7 | 2.484673007 | 0 |
| EPHB4   | 0.273709611 | 0 |
| TUBB4A  | 2.125011035 | 0 |
| RTN4    | 2.057498911 | 0 |
| PLXND1  | 2.284524635 | 0 |
| DOCK1   | 0.465017957 | 0 |

|                |             |   |
|----------------|-------------|---|
| <i>PRKAR2B</i> | 2.486517642 | 0 |
| <i>TUBB2B</i>  | 2.004743045 | 0 |
| <i>ABLIM3</i>  | 0.358447897 | 0 |
| <i>GLI3</i>    | 0.243223242 | 0 |
| <i>ROBO2</i>   | 2.405882747 | 0 |
| <i>MIR23B</i>  | 0.428406121 | 0 |
| <i>ITGA4</i>   | 2.258284631 | 0 |

**Supplementary Table 6a:** Univariable cox regression analysis of survival by increasing *SEMA4D* expression across Group 3 and 4 medulloblastoma

| Group                    | HR     | 95% CI        | p-value  |
|--------------------------|--------|---------------|----------|
| Group 3 and 4<br>(n=377) | 0.5987 | 0.4538-0.7898 | 0.000283 |
| Group 3<br>(n=113)       | 0.8996 | 0.58-1.395    | 0.636    |
| Group 4<br>(n=264)       | 0.4622 | 0.2644-0.808  | 0.00676  |

**Supplementary Table 6b:** Statistical analyses of survival in patients exhibiting high *SEMA6A*, *NRP1*, *NRP2*, or *L1CAM* gene expression relative to patients with low *SEMA6A*, *NRP1*, *NRP2* or *L1CAM* gene expression

| Gene Assignment | Survival_Pvalue | Survival_Qvalue |
|-----------------|-----------------|-----------------|
| <i>SEMA6A</i>   | 0.107           | 0.433           |
| <i>NRP1</i>     | 0.935           | 0.973           |
| <i>NRP2</i>     | 0.419           | 0.723           |
| <i>L1CAM</i>    | 0.961           | 0.981           |

**Supplementary Table 7:** Gene Set Enrichment Analysis (GSEA) results for Reactome and KEGG databases identified pathways significantly enriched in gene sets that were downregulated in D283 Scramble relative to OTX2 KD tumorspheres

| <b>NAME (Reactome Database)</b>          | <b>SIZE</b> | <b>ES</b> | <b>NES</b> | <b>NOM p-val</b> | <b>FDR q-val</b> | <b>FWER p-val</b> |
|------------------------------------------|-------------|-----------|------------|------------------|------------------|-------------------|
| SEMAPHORIN INTERACTIONS                  | 63          | -0.65     | -1.96      | 0                | 0.0411           | 0.047             |
| AXON GUIDANCE                            | 237         | -0.52     | -1.88      | 0                | 0.0640           | 0.139             |
| DEVELOPMENTAL BIOLOGY                    | 377         | -0.49     | -1.84      | 0                | 0.0780           | 0.237             |
| INTERACTION BETWEEN L1 AND ANKYRINS      | 21          | -0.74     | -1.84      | 0.0026           | 0.0591           | 0.240             |
| SIGNALING BY ROBO RECEPTOR               | 28          | -0.71     | -1.81      | 0                | 0.0661           | 0.315             |
| L1CAM INTERACTIONS                       | 82          | -0.52     | -1.65      | 0.0030           | 0.3009           | 0.894             |
| NETRIN1 SIGNALING                        | 37          | -0.58     | -1.63      | 0.0078           | 0.3097           | 0.926             |
| BOTULINUM NEUROTOXICITY                  | 17          | -0.67     | -1.57      | 0.0300           | 0.4194           | 0.982             |
| INSULIN SYNTHESIS AND PROCESSING         | 19          | -0.65     | -1.54      | 0.0389           | 0.4923           | 0.995             |
| SEMA4D IN SEMAPHORIN SIGNALING           | 29          | -0.59     | -1.53      | 0.0354           | 0.4746           | 0.995             |
|                                          |             |           |            |                  |                  |                   |
| <b>NAME (KEGG Database)</b>              | <b>SIZE</b> | <b>ES</b> | <b>NES</b> | <b>NOM p-val</b> | <b>FDR q-val</b> | <b>FWER p-val</b> |
| AXON GUIDANCE                            | 126         | -0.66     | -2.21      | 0                | 0                | 0                 |
| ERBB SIGNALING PATHWAY                   | 86          | -0.51     | -1.57      | 0.0185           | 0.5618           | 0.641             |
| VASOPRESSIN REGULATED WATER REABSORPTION | 43          | -0.53     | -1.48      | 0.0256           | 0.7283           | 0.873             |
| CELL ADHESION MOLECULES CAMS             | 125         | -0.43     | -1.45      | 0.0101           | 0.6949           | 0.926             |
| MAPK SIGNALING PATHWAY                   | 260         | -0.40     | -1.43      | 0.0046           | 0.6085           | 0.938             |
| TYPE I DIABETES MELLITUS                 | 36          | -0.52     | -1.41      | 0.0635           | 0.5669           | 0.956             |
| LONG TERM DEPRESSION                     | 66          | -0.46     | -1.40      | 0.0483           | 0.5385           | 0.969             |
| LONG TERM POTENTIATION                   | 70          | -0.46     | -1.38      | 0.0718           | 0.5132           | 0.979             |
| TYPE II DIABETES MELLITUS                | 46          | -0.48     | -1.37      | 0.0507           | 0.5142           | 0.987             |
| T CELL RECEPTOR SIGNALING PATHWAY        | 105         | -0.42     | -1.36      | 0.0401           | 0.4860           | 0.988             |



**Supplementary Table 8:** GSEA revealed that genes associated with SEMA4D signaling were enriched in gene sets that were downregulated in D283 Scramble vs. OTX2 KD tumorspheres

| <b>GENE SYMBOL</b> | <b>GENE_TITLE</b>                                                                                                | <b>RUNNING ES</b> |
|--------------------|------------------------------------------------------------------------------------------------------------------|-------------------|
| <b>ARHGEF12</b>    | Rho guanine nucleotide exchange factor (GEF) 12                                                                  | -0.5662338        |
| <b>ROCK2</b>       | Rho-associated, coiled-coil containing protein kinase 2                                                          | -0.54986334       |
| <b>ROCK1</b>       | Rho-associated, coiled-coil containing protein kinase 1                                                          | -0.55364746       |
| <b>MYL6</b>        | myosin, light chain 6, alkali, smooth muscle and non-muscle                                                      | -0.54413474       |
| <b>MYL12B</b>      | null                                                                                                             | -0.5143689        |
| <b>MYH10</b>       | myosin, heavy chain 10, non-muscle                                                                               | -0.48504782       |
| <b>PLXNB1</b>      | plexin B1                                                                                                        | -0.4504612        |
| <b>MYH9</b>        | myosin, heavy chain 9, non-muscle                                                                                | -0.40517303       |
| <b>MYL9</b>        | myosin, light chain 9, regulatory                                                                                | -0.3621211        |
| <b>ARHGEF11</b>    | Rho guanine nucleotide exchange factor (GEF) 11                                                                  | -0.29258606       |
| <b>SEMA4D</b>      | sema domain, immunoglobulin domain (Ig), transmembrane domain (TM) and short cytoplasmic domain, (semaphorin) 4D | -0.19715172       |
| <b>RHOB</b>        | ras homolog gene family, member B                                                                                | -0.098245345      |
| <b>ARHGAP35</b>    | null                                                                                                             | 0.011831163       |
